# Supplementary material
Source: Springer Nature journal article supplement (https://www.springermedizin.de/resource/supplementary/12955_2006_267_MOESM4_ESM.pdf/9560030)

### a) Daily Activities

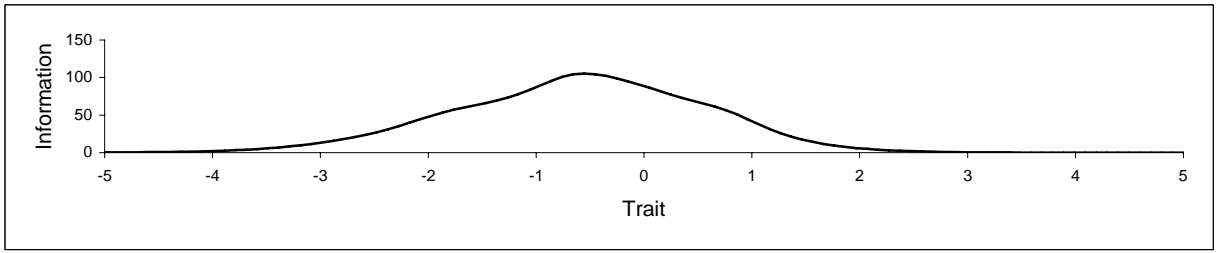

### b) Walking

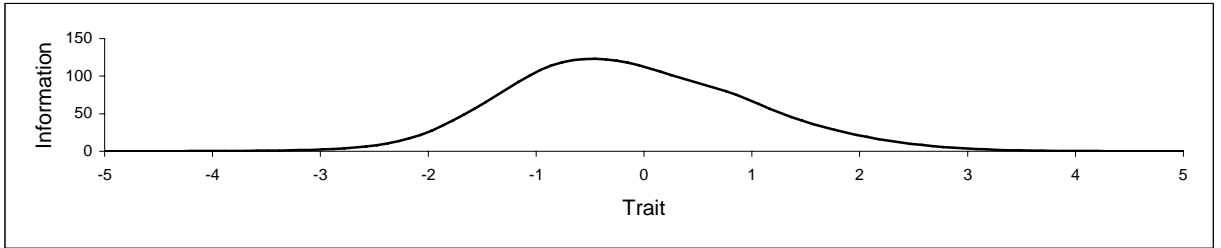

### c) Handling Objects

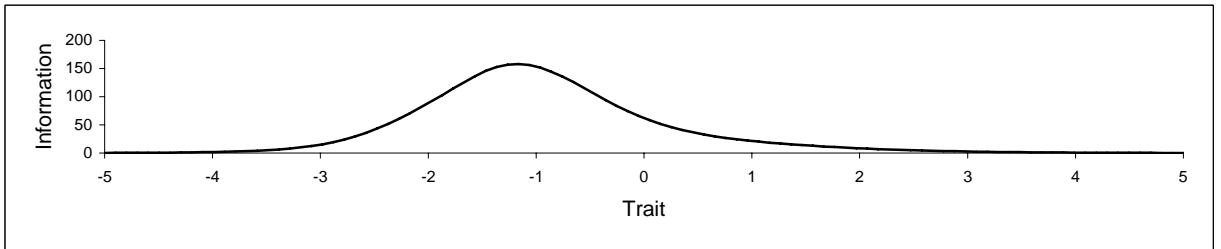

### d) Pain or Discomfort

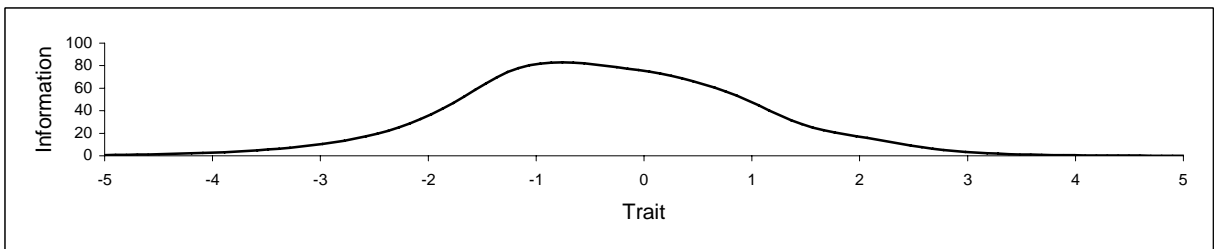

### e) Feelings

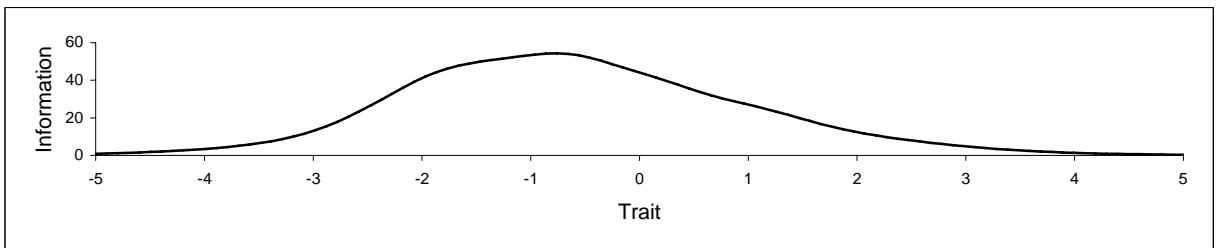

Supplement: MOESM4 [file 9560030]
